# Supplementary material
Source: PubMed Central journal article supplement (PMC4567972)
Supplement: NIHMS687602-supplement-01.pdf [file NIHMS687602-supplement-01.pdf]

## Supplemental Material

### MATERIALS AND METHODS

#### Keratinocyte cell culture and treatments.

Primary human keratinocytes (Cascade Biologics; Grand Island, NY) were grown in serum-free keratinocyte growth medium (EpiLife; Cascade Biologics), with 1% human keratinocyte growth supplement (Cascade Biologics), 0.06 mM CaCl<sub>2</sub>, and antibiotics. Keratinocytes were plated at 100,000 per well in a 24 well plate, coated with collagen matrix (Cascade Biologics) and were allowed to adhere overnight before treatment. When indicated, cells were treated with media control, *E. coli* derived LPS, *S. aureus* derived PG, or LTA (Sigma; St. Louis, MO), or with *S. aureus* toxins TSST or SEB (Toxin Technology; Sarasota, FL). The MyD88 peptide inhibitor or control peptide (the control peptide is identical to the inhibitor, but lacks the homodimerization sequence: RDVLPGT) (Imgenex, San Diego, CA). Peptides were used at 100 μM, and cells were pre-treated for 6 hours prior to addition of LTA. When indicated, cells were treated with IL-4 and IL-13 cytokines (50 ng/ml each) or TNF-α (20 ng/ml) from R&D systems (Minneapolis, MN) for 24 hours. In some cases (where indicated) cytokine treatment was followed by further treatment with media or LTA for an additional 24 hours.

#### Quantitative real-time PCR (RT-PCR).

Total RNA was isolated by RNeasy Mini Kits (Qiagen, Inc.; Valencia, CA) according to the manufacturer's protocol. One microgram of RNA was reverse-transcribed using the Qiagen Quantiscript kit according to manufacturers protocol. RT-PCR was performed and analyzed by the dual-labeled fluorogenic probe method by using an ABI Prism 7300 sequence detector (Applied Biosystems; Foster City, CA). Primers and probes for human MMP-1, 9, and 10, STAT6, Keratin 14, TIMP-1, 2, and 3 and beta actin were purchased from Applied Biosystems.

Amplification reactions were performed in MicroAmp optical plates (Applied Biosystems) in a 25- $\mu$ L volume as previously described (Howell *et al.*, 2007). All reactions were normalized to beta actin.

### **siRNA transfection.**

Second-passage keratinocytes of 50-60% confluence were transfected according to the manufacturer's instructions using Lipofectamine 2000 (Invitrogen; Grand Island, NY) with 20  $\mu$ M non-targeting (microarray tested for minimal targeting of human genes) or STAT6 Smartpool siRNA (Dharmacon-Fisher Scientific; Pittsburgh PA) in antibiotic free media.

### **Wound scratch assay**

The migration of human primary keratinocytes in monolayers was analyzed using an *in vitro* wound scratch assay. Keratinocytes were seeded into Collagen I coated, 24-well plates and treated as indicated. Cell monolayers were then scratched using a 20  $\mu$ l pipette tip creating a cell free area as previously described (Eyerich *et al.*, 2009). "Wounded" monolayers were then washed three times with PBS to remove detached cells, and media was replaced. Wells were then photographed (t = 0) with a 3i Marianas microscope (Intelligent Imaging Innovations; Denver, CO) with a 5x objective lens. The residual gap area between the migrating cell front at 24 hours (t = 24) was measured and expressed relative to the initial scratch area. Quantitation was performed using Slidebook software (Denver, CO).

### **MMP-1, 9, 10 ELISAs**

MMP levels in the culture supernatant were measured with a commercial ELISA assay (R&D Systems, Minneapolis, MN). Keratinocytes grown on a 24- well

plate were stimulated as indicated. Cell-free supernatants were tested for MMP levels according to the manufacturer's instructions.

**Statistical analyses.**

All statistical analysis was conducted using Graph Pad Prism. Comparisons of expression levels were performed using analysis of variance (ANOVA) techniques and Student's *t* tests as appropriate.

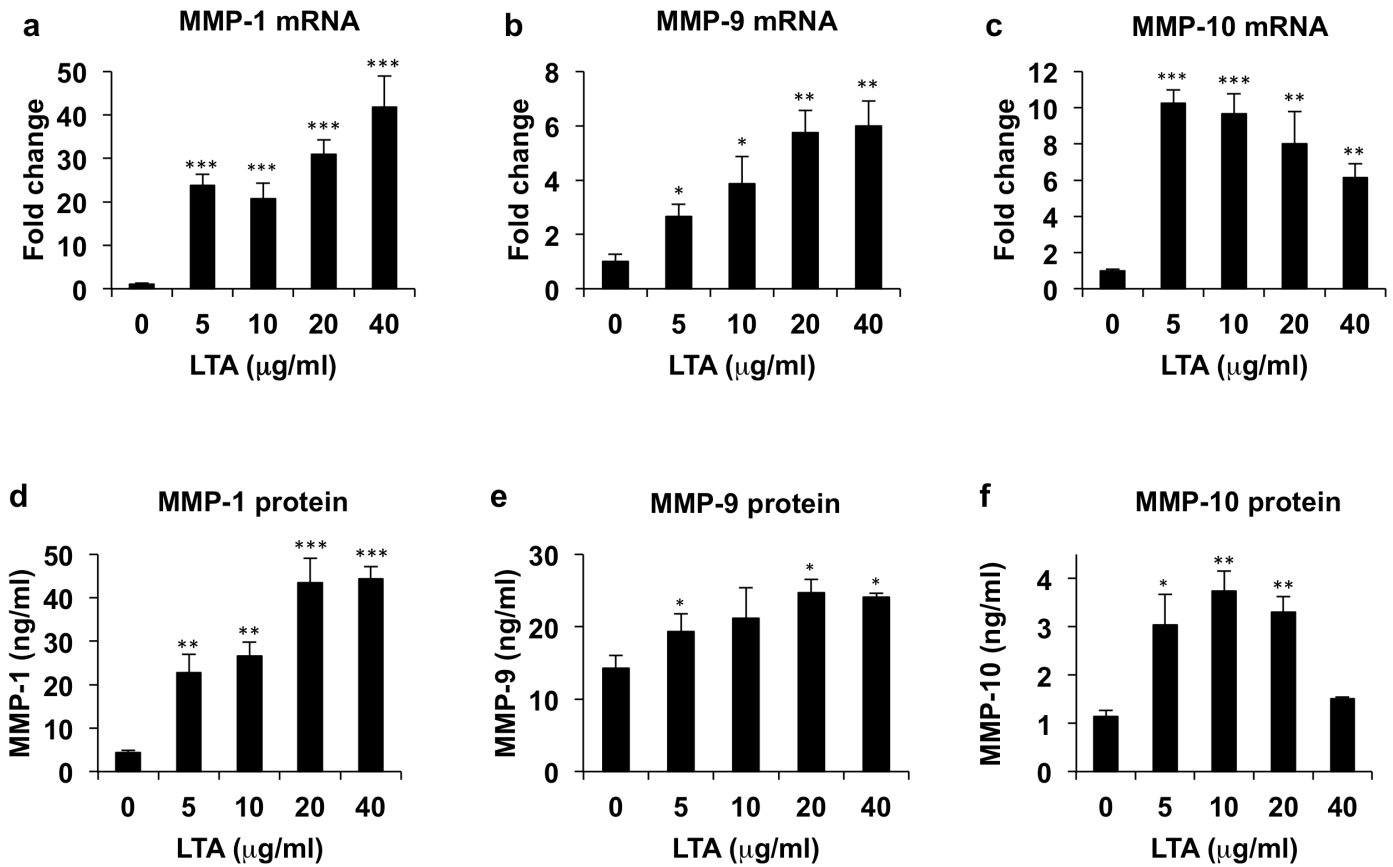

**Figure S1. *S. aureus* LTA induces MMP-1, 9, and 10 mRNA and protein expression in a dose dependent manner.** Primary keratinocytes were cultured in the presence of the indicated concentration of *S. aureus* LTA for 24 hours. Expression of mRNA was measured by real-time PCR for (a) MMP-1, (b) MMP-9, and (c) MMP-10, and normalized to beta actin. Fold changes in MMP expression were calculated relative to medium control. Levels of protein were measured by ELISA for (d) MMP-1, (e) MMP-9, and (f) MMP-10. Data are mean  $\pm$  SEM,  $n = 3$ . \* $P < 0.05$ ; \*\* $P < 0.01$ ; \*\*\* $P < 0.001$  (as compared to control medium).

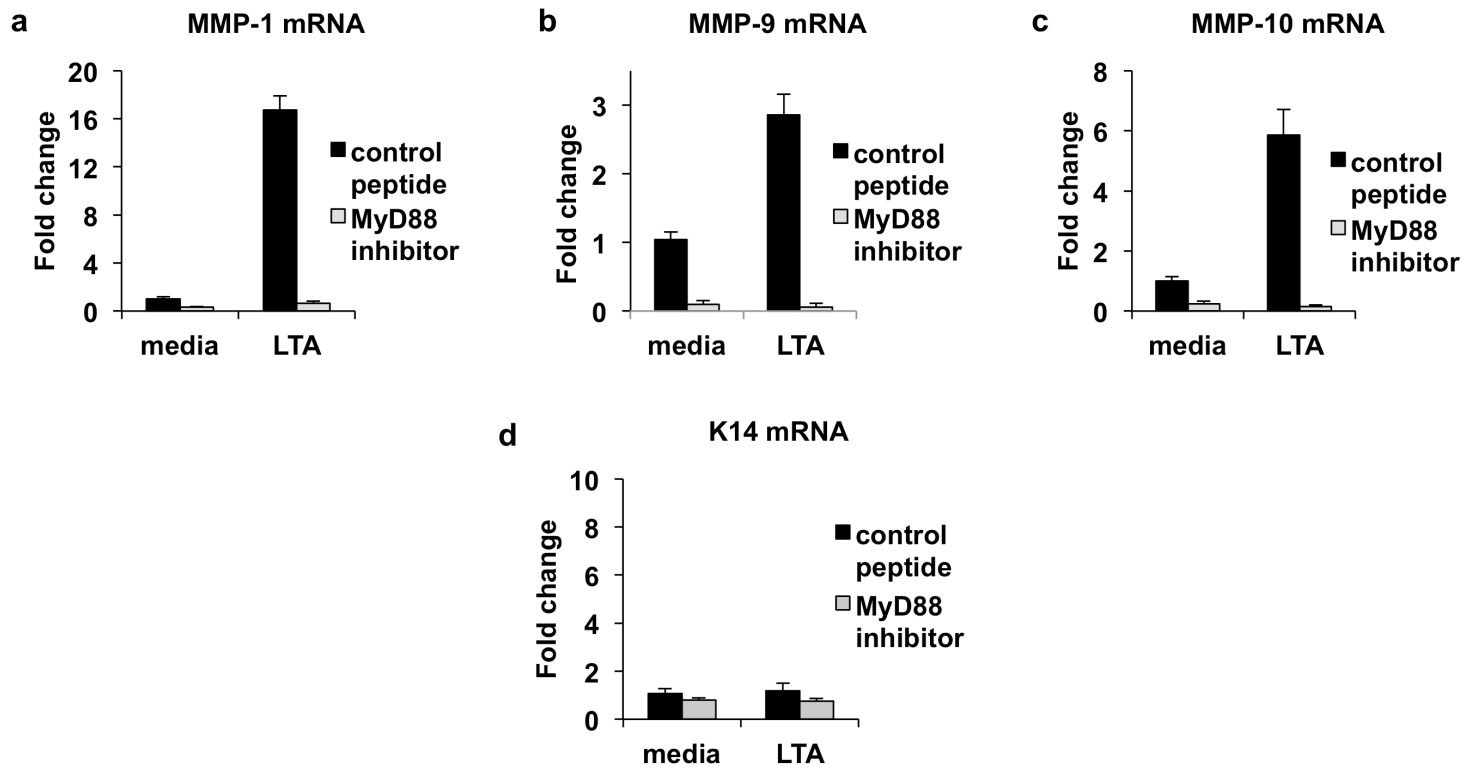

**Figure S2. LTA induced MMP production is dependent on MyD88 signaling.** Keratinocytes were pretreated with a peptide inhibitor of MyD88, or control peptide as indicated. LTA was then added for 24 hours. Gene expression was analyzed by real-time PCR for (a) MMP-1, (b) MMP-9, (c) MMP-10, and (d) K14 (control) and normalized to beta actin. Fold change in MMP expression was measured relative to medium control. Data are mean  $\pm$  SEM, n = 3.

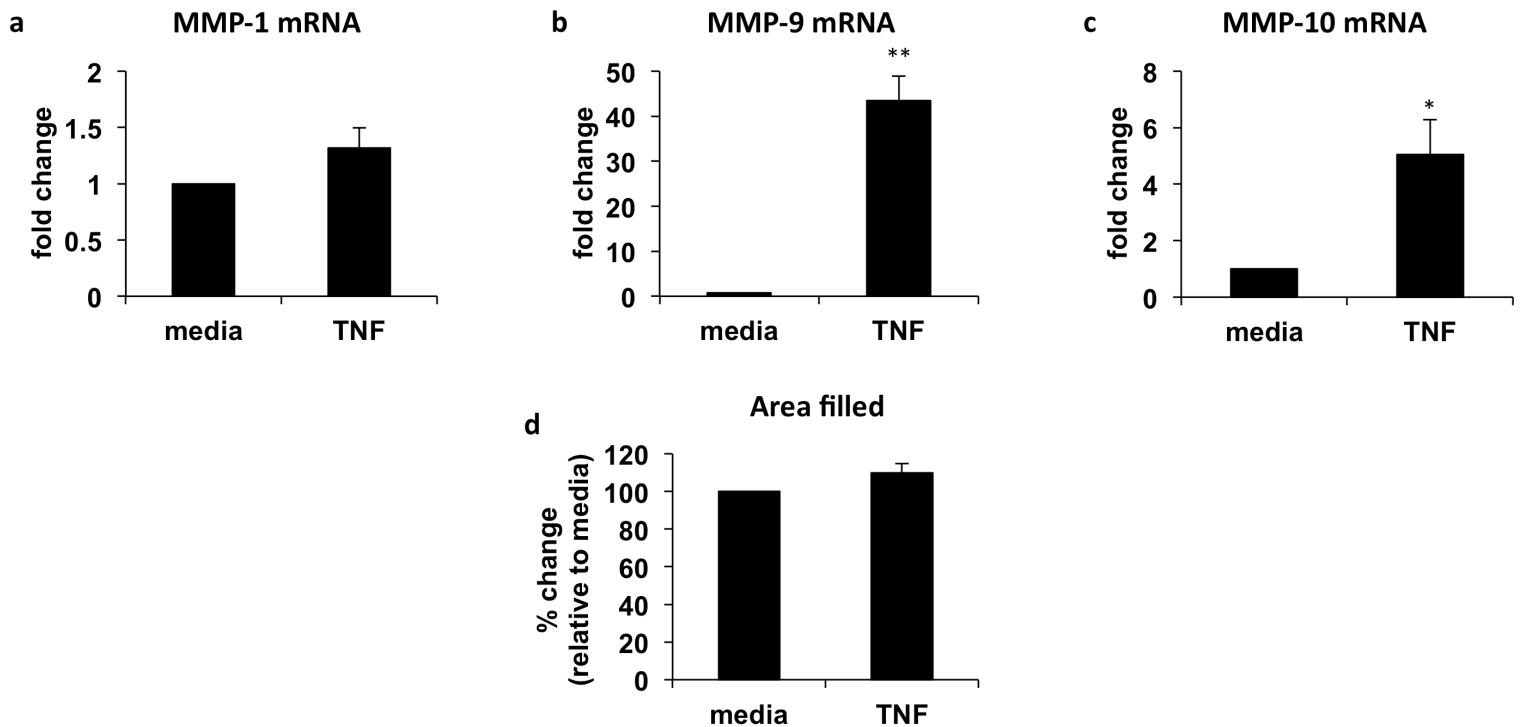

**Figure S3. MMP expression and keratinocyte migration are not inhibited by TNF- $\alpha$ .** Primary human keratinocytes were pre-treated with medium or TNF- $\alpha$  for 24 hours. Gene expression was analyzed by real-time PCR, for (a) MMP-1, (b) MMP-9, and (c) MMP-10, and normalized to beta actin. Fold change in MMP expression was measured relative to media control. Data are mean  $\pm$  SEM, n = 3. (d) Primary human keratinocytes were cultured with keratinocyte medium alone, or in the presence of TNF- $\alpha$  for 24 hours. The cells were then scratched with a pipet tip. The defined area of the wound was photographed under phase-contrast microscopy at time 0 h and at 24 h. The closure of the wounded area at 24 h was quantitated. The change in closure with TNF- $\alpha$  is expressed relative to media control. Data are mean  $\pm$  SEM, n = 3.

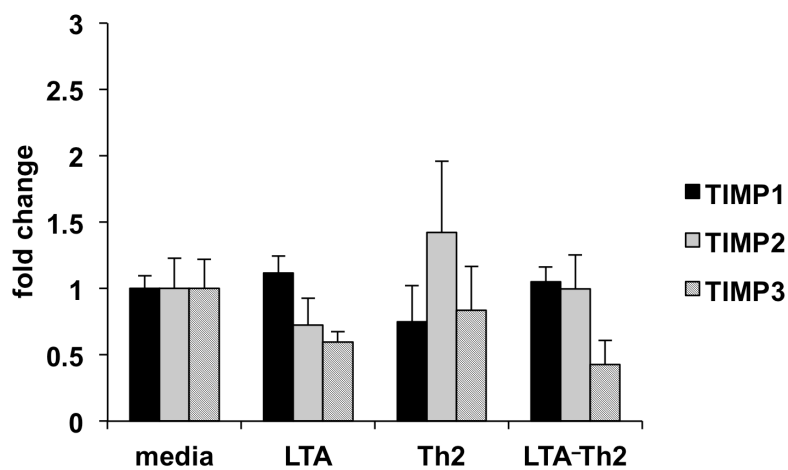

**Figure S4. TIMP induction is not inhibited by Th2 cytokines.** Primary human keratinocytes were pre-treated with medium, or IL-4/IL-13 for 24 hours. Following pre-treatment, cells were then cultured in the presence or absence of LTA for an additional 24 hours. Gene expression was analyzed by real-time PCR, for TIMP-1, -2, and -3, and normalized to beta actin. Fold change in TIMP expression was measured relative to medium control. Data are mean  $\pm$  SEM, n = 3
